# Supplementary material for: Effects of the Fukushima Daiichi nuclear accident on goshawk reproduction
Source: Springer Nature journal article supplement (doi:10.1038/srep09405), 2015-03-24
Supplement: srep09405-s1.pdf [file srep09405-s1.pdf]

Effects of the Fukushima Daiichi nuclear accident on goshawk reproduction | Scientific Reports


Skip to main content

Thank you for visiting nature.com. You are using a browser version with limited support for CSS. To obtain
the best experience, we recommend you use a more up to date browser (or turn off compatibility mode in
Internet Explorer). In the meantime, to ensure continued support, we are displaying the site without styles
and JavaScript.

Advertisement

- View all journals
- Search
- My Account

  Login

- Explore content
- About the journal
- Publish with us

- Sign up for alerts
- RSS feed


1. nature
2. scientific reports
3. articles
4. article

Effects of the Fukushima Daiichi nuclear accident on goshawk reproduction

Download PDF

Download PDF

- Article
- Open access
- Published: 24 March 2015

# Effects of the Fukushima Daiichi nuclear accident on goshawk reproduction

- Kaori Murase1,
- Joe Murase2,
- Reiko Horie2 &
- …
- Koichi Endo2

Show authors

*Scientific Reports*
**volume 5**, Article number: 9405 (2015)
Cite this article

- 12k Accesses
- 47 Citations
- 184 Altmetric
- Metrics details

### Subjects

- Behavioural ecology
- Conservation biology

## Abstract

Although the influence of nuclear accidents on the reproduction of top predators has not been investigated, it is important that we identify the effects of such accidents because humans are also top predators. We conducted field observation for 22 years and analysed the reproductive performance of the goshawk (*Accipiter gentilis fujiyamae*), a top avian predator in the North Kanto area of Japan, before and after the accidents at the Fukushima Daiichi nuclear power plant that occurred in 2011. The reproductive performance declined markedly compared with the pre-accident years and progressively decreased for the three post-accident study years. Moreover, it was suggested that these declines were primarily caused by an increase in the air dose rate of radio-active contaminants measured under the nests caused by the nuclear accidents, rather than by other factors. We consider the trends in the changes of the reproductive success rates and suggest that internal exposure may play an important role in the reproductive performance of the goshawk, as well as external exposure.


### Similar content being viewed by others

### Predator-induced fear causes PTSD-like changes in the brains and behaviour of wild animals

Article
Open access
07 August 2019

### Climate change-driven cooling can kill marine megafauna at their distributional limits

Article
15 April 2024

### Pesticide use negatively affects bumble bees across European landscapes

Article
Open access
29 November 2023

## Introduction

The goshawk (*Accipiter gentilis*) is a raptor and a top predator that preys on birds and mammals1,2. Although there have been some reports on the reproductive performance of small birds after the Chernobyl nuclear power plant disaster3,4,5,6, detailed investigations on raptors, such as the goshawk, have not been conducted. Understanding the impact of nuclear accidents on the reproductive performance of a predatory raptor will be significant for humans and other top predators. The predatory raptor is one of the most suitable species to estimate the effect of the radiation from nuclear accidents on the top predators, for such animal species cannot be said to suffer from economical or psychological issues, which are often disputed in human subjects7,8.

Previous studies have compared the characteristics of birds in areas with different degrees of radioactive contamination4,5,9,10. However, there is no existing research providing a detailed comparison of the reproductive performance of the same species at the same nest sites before and after a nuclear power plant disaster. We investigated the reproductive performance of the goshawk (*Accipiter gentilis fujiyamae*) in Japan, since 1992, before the 2011 Tōhoku earthquake and the accidents at the Fukushima Daiichi nuclear power plant. We mapped their breeding sites as part of our field research and in this study, we compared their reproductive performance in the 19 years before the nuclear accidents with the three years after the accidents. Therefore, this study will provide relevant ecological information for discussing the impacts of a nuclear accident.

The previous studies that investigated the effects of a nuclear accident on wild birds reported abnormalities of body form and of reproductive performance, but the causes were not clearly identified. In addition, when a negative effect was observed, the cause may not have originated from the nuclear accident. Other factors, such as the environment near the breeding site (e.g., lack of food resources), can negatively affect the reproductive performance. In this study, we measured the air dose rates of radio-active contaminants under the nests and analysed the nest success11 with a Bayesian method, incorporating environmental factors into the statistical model.

In this paper, we show three results. The first is when the nuclear accidents began to affect the reproductive performance of the Goshawk and which breeding stage was affected. The second is the relationship between the air dose rate under the nests and the Goshawk's reproductive performance. The third is the comparison between the effect of the air dose rate and the other environmental factors (e.g., canopy closure, micro-climate stability, the abundance or availability of prey species, predation and human disturbance11) on the reproductive performance.

## Results

### Study area and observations

Our study area is shown in Figure 1. The goshawk is a protected bird species in Japan (Act on Conservation of Endangered Species of Wild Fauna and Flora; 4th Red List, Near Threatened). To prevent illegal capture, the locations of their breeding sites are not shown. Goshawk reproductive performance at the breeding sites in 1992–2010 (prequake years) and 2011–2013 (postquake years) is shown in Tables 1 and 2. The air dose rates under the nests at 13 sites were measured in June 2012. The 13 nest sites were chosen at random. For these 13 sites, the air dose rates and the reproductive performances of goshawks for the period are shown in Table 3.

**Table 1 Prequake reproductive performance of goshawks in 1992–2010**

Full size table

**Table 2 Postquake reproductive performance of goshawks in 2011–2013**

Full size table

**Table 3 Pre- and postquake reproductive performance of goshawks at 13 breeding sites in recent ten years and the postquake air dose rate. The air dose rates were measured on June 28, 2012**

Full size table

**Figure 1**

Study area.

Our study area is located in North Kanto, Japan. The area is roughly indicated by the white circle in the figure for the protection of the goshawk. The Fukushima Daiichi nuclear power plant is within the range of 100 to 120 km from this area. Air dose rates (μSv/h) on May 31, 2012, are shown. Adapted from ‘Extension Site of Distribution Map of Radiation Dose, etc.,/Digital Japan’ (http://ramap.jmc.or.jp/map/eng/).

Full size image

### Reproductive performance

The rates of the four breeding stages of the goshawk are shown in Table 4 and Figure 2, left. The four stages are site occupancy (stage 1), incubating (stage 2), hatching (stage 3) and fledging (stage 4). The rate of each postquake year was compared with the corresponding 95% credible interval (CRI) of the rate of the prequake 19 years. The nest success11, a proportion of fledged nests to incubated nests, are also shown (Fig. 2e, left, Table 4, Nest success).

**Table 4 Statistics of the rates of the four breeding stages and the nest success in pre- and postquake years. The rates in each postquake year are compared with the 95% credible intervals (CRI) of the prequake years' rates. The position of the rate of each postquake year in the corresponding 95% CRI is shown in the percentile columns. The rates outside the 95% CRIs are denoted by \***

Full size table

**Figure 2**

Success rates and effects of the air dose rate.

The rates of the four breeding stages and the nest success (left) and the coefficients of the air dose rate corresponding to the stages (right) are shown. Posterior distributions of prequake rates are indicated as solid lines and the rates of the postquake years are indicated as red dotted lines (2011), green dot-dashed lines (2012) and blue dashed lines (2013) (left). Posterior distributions of the air dose rate coefficients, β2, are indicated as solid lines (right). (a), Site occupancy (stage 1). (b), Incubating (stage 2). (c), Hatching (stage 3). (d), Fledging (stage 4). (e), Nest success.

Full size image

In 2011, the site occupancy rate (stage 1) and fledging rate (stage 4) declined beyond the 95% CRIs of the prequake years (Fig. 2, left, Table 4). In 2012, the site occupancy rate (stage 1), incubating rate (stage 2), fledging rate (stage 4) and the nest success declined (Fig. 2, left, Table 4). In 2013, the rates of all the four stages and the nest success were outside the 95% CRIs (Fig. 2, left, Table 4).

### Influence of the air dose rate

We estimated the effect of the air dose rate on the breeding success. The measurements of the air dose rate were used with the observed data (Table 3). Using the air dose rate as an explanatory variable, a hierarchical Bayesian model accounting for differences among the breeding sites was employed (see Methods). The effect was estimated as a posterior distribution of β2, a coefficient of the air dose rate in our model, for each breeding stage. For the rates of the four stages and the nest success, the results are shown in Tables 4, 5 and Figure 2. For site occupancy (stage 1) and incubating (stage 2), the 95% CRIs contained zero near the centre (Figs. 2a and b, right, Table 5). In contrast, although for hatching (stage 3) the 95% CRI contained zero, the zero was on its upper boundary and more than 96% of the posterior distribution had a negative value (Fig. 2c, right, Table 5). Moreover, for fledging (stage 4), the 95% CRI did not contain zero and more than 98% of the posterior distribution had a negative value (Fig. 2d, right, Table 5). The nest success also had a negative value in more than 99% of the posterior distribution (Fig. 2e, right, Table 5). These results indicated that the air dose rate under the nests did not associate with site occupancy (stage 1) or incubating (stage 2), whereas hatching (stage 3) and fledging (stage 4) were negatively associated with the air dose rate. Overall, the nest success was negatively and strongly associated with the air dose rate.

**Table 5 Statistics of the coefficients of the air dose rate. The 95% CRIs of the air dose rate coefficients, β2, are shown for the four breeding stages and the nest success. The proportions of β2 with negative values in the posterior distributions are also shown in the β2 < 0 column and are denoted by \* if they exceed 97.5%**

Full size table

We described the characteristics of each stage by comparing its rate (Fig. 2, left) with the effect of the air dose rate (Fig. 2, right). For site occupancy (stage 1), although the air dose rate was not related to the early stages of breeding behaviour of the goshawk (Fig. 2a, right), the rate markedly declined (Fig. 2a, left). One likely explanation for the decline in rate is the presence of other environmental factors such as aftershocks.

For incubating (stage 2), although the air dose rate under the nests did not significantly associate with the incubating rate (Fig. 2b, right), the rate fell in 2012 and 2013 (Fig. 2b, left). This result may have been caused by the birds' life history during the nonbreeding season. In our study area, the goshawks hunt in a broader area in the nonbreeding season than in the breeding season12. It is likely that the condition of adult birds (particularly the egg-laying rate) was most closely related to the radioactive contamination of a broad circumferential area (i.e., the average radioactive level) and not with the air dose rate of the smaller breeding area. According to the official governmental report13, the area was contaminated mainly with radiocesium and other radionuclides. The decrease in the incubating rate in this study may be related to the accidents at the Fukushima Daiichi nuclear power plant. It is possible that the rate did not fall in 2011 because the nuclear accidents occurred in March, at the beginning of the goshawk breeding season: the adult goshawks in March 2011 would have been as healthy as during prequake years.

For hatching (stage 3), the air dose rates under the nests had negative association with the hatching rates (Fig. 2c, right), which dropped in 2013 (Fig. 2c, left). Moreover, for fledging (stage 4), the air dose rates under the nests had strong negative relationship with the fledging rates (Fig. 2d, right), which declined in all of the postquake years (Fig. 2d, left). Therefore, we suggest that the hatching rate and fledging rate of the goshawks was strongly related to the level of radioactive contamination under the nests. It is interesting that the rates of these stages tended to progressively decrease for years. One possible explanation is internal exposure (see Discussion).

The nest success (fledged/incubated) also clearly negatively associated with the air dose rate (Fig. 2e, right) and fell in 2012 and 2013 (Fig. 2e, left). Before the accidents at the Fukushima Daiichi nuclear power plant in 2011, the nest success of the goshawks did not fall as low as 50% as in 2013. The minimum value of the prequake years was 68% in 1992 (Table 1). Developing embryos or young individuals are strongly affected by radioactive contamination14 and the nestling goshawks are no exception.

### Air dose rate effect vs. site effect

To clearly show the major factors that contributed to the decrease in the nest success, the detailed results of the nest success are shown in Figure 3 and in the Supplementary Table S1. The detailed results for the four breeding stages are also shown in the Supplementary Figures S1–S4.

**Figure 3**

Results of the Bayesian analysis for the nest success.

The posterior distributions of the parameters of the hierarchical Bayesian model for the nest success are shown. (a), The air dose rate coefficient, β2. This is the same figure as Figure 2e, right, except for its range. (b), The nest success of each breeding site. (c), Site effect of each breeding site. The open circles indicate prequake nest success and the filled circles indicate postquake nest success. The horizontal bars indicate 95% CRIs.

Full size image

In all of the breeding sites, the posterior mean values of the nest success after the earthquake were lower than those before earthquake. This is particularly clear for sites No. 10, where the 95% CRI did not overlap with that of the prequake (Fig. 3b, Supplementary Table S1). The site effects, the composite of the effects other than that of the air dose rate, *r*, changed slightly but had no tendency in any particular direction.

The air dose rate had a negative association with the nest success, whereas the site effect also decreased and negatively associated with the nest success in some breeding sites (site Nos. 5, 6, 9, 10, 11). How large was the impact of the site effect when compared with the effect of the air dose rate? The ratios of the effect of the air dose rate and the site effect are shown in Table 6. In the five sites, the effect of the air dose rate was approximately 1.1–8.1 times that of the site effect. The site effect in each of the remaining sites increased and had a positive effect on the nest success. In brief, in all of the breeding sites, the effect of the air dose rate was the major factor associated with the decrease in the nest success.

**Table 6 Air dose rate effect vs. breeding site effect. The air dose rate effect and the breeding site effect on nest success are compared. For each breeding site, the effect due to the difference of the air dose rate (Dose effect) and the effect due to the difference of the breeding site effect (Site effect), between pre- and postquake years, are shown. The Dose effect was calculated as where −3.909 is the posterior mean of β2, the coefficient of the air dose rate. The Site effect was calculated as The ratio of the Dose effect to the Site effect is shown in the D/S column. If the Site effect takes positive value, it is denoted by -, for we focused attention on the negative effects on the nest success. A ratio higher than 1.0 indicates a greater importance of the Dose effect**

Full size table

The next question was the extent to which the air dose rate affected the nest success. Using the posterior mean of the β2, −3.909 (Table 5) and the posterior distribution of the nest success for site No. 10, where the nest success in the prequake period was the highest among the breeding sites (Fig. 3b, Supplementary Table S1), the maximum drop of the nest success was calculated to be 0.100 with a 0.1 μSv/h increase in the air dose rate (Supplementary Fig. S5).

## Discussion

Our results suggest that the radioactive material emitted by the accidents at the Fukushima Daiichi nuclear power plant negatively affected the reproductive performance of the goshawk. The nest success was negatively associated with the air dose rates measured under the nests. The mechanism was predicted to be external exposure to gamma radiation, but the situation was apparently not so simple. Unless the fallout of radioactive material continues, the air dose rate (the intensity of gamma radiation) decreases over time and the rates of the breeding stages and the nest success should gradually return to the prequake levels. The rates of the breeding stages and the nest success, however, did not follow this course.

The goshawk is a top predator and its food organisms occupy a high ecological niche15,16. It is not clear whether the bioaccumulation of radioactive material would occur in these forested ecosystems, but at least the transfer of radioactive material to higher trophic levels appears to have occurred17. In the case of the Chernobyl, the accumulation of 137Cs or 90Sr was recognised14 and a decrease in the nest success of swallows (*Hirundo rustica*) was also reported5. Further, it was well investigated that animals at higher trophic levels generally had higher levels of radionuclide concentrations than animals at lower levels18,19,20. Thus, we suspect that the mechanism underlying the decrease in the reproductive success of goshawks was internal exposure by intake of radioactive material emitted by the nuclear accidents at Fukushima, as well as the external exposure from the air dose rates. A high level of air dose rates should reflect the presence of a large amount of radioactive material. If we assume that the goshawks experienced internal exposure, our results can be interpreted as follows: The degree of contamination of the food eaten by the adult birds and the chicks was low in 2011 because it would take time for the radioactive material to prevail or possibly bioaccumulate in the top predators. As time progressed, the contamination reached a top predator, the goshawk and their reproductive success then decreased.

Some radionuclides, particularly 90Sr, are not readily excreted21. The negative effects caused by possible continuous internal exposure will therefore be a matter of serious concern. To further identify the effects of internal exposure, the cause of the decline in the goshawk nest success will be clarified by investigating the amounts of radioactive material and the transfer of this material between the goshawks and their prey. Therefore, measuring the accumulation of the radioactive materials in the goshawks and their prey will be determined in future studies.

Accidents at nuclear power plants result in two types of negative effects on reproduction in avian species: direct and indirect effects. Direct effects include the external or internal exposure of the eggs or nestlings as described above. On the other hand, the indirect effects of exposure include the decrease in prey species and the reduction in mean age due to a reduced survival rate22 and/or accelerated senescence23. With regard to the Goshawk, some studies have reported a reduction in the abundance of prey species near Fukushima24,25, while the reduction in mean age is thought to be quantifiable as some goshawks are faithful to their chosen nest site where they tend to remain for life26. Further field research and DNA analysis is needed to further examine these indirect effects. Young goshawks are assumed to decrease due to the reduction in reproductive performance of the adult goshawks, which then increases the need for their preservation. The existing laws regarding Goshawk preservation requires permission be obtained before even transferring a single feather to other research institution for examination, which will hinder collecting a lot of samples for further research. This situation must first be addressed. If there exists the negative effects of radiation on the reproductive season of the Goshawk, the quantitative or qualitative data (e.g., the nest success rate or the shape of feathers) which will be obtained from surviving birds or other wildlife species may just reflect the individuals that have a relatively lower sensitivity to radiation. In other words, such studies may underestimate the negative influence of radiation. A study plan that enables the monitoring of a broader area over a longer term is also required due to concerns regarding the negative influences on not only wildlife other than the goshawks, but also humans.

## Methods

### Ethic statements

This study was carried out in accordance with the guidelines for the conservation of birds of prey (revised edition) published by the Ministry of the Environment and the guidelines published by the Wildlife Research Center of Kyoto University. All experimental protocols were approved by the Ministry of the Environment.

### Fieldwork

We conducted field research for 22 years. The research period was 1992–2013. The same field method was used over the entire period. We performed a thorough search of the study area to identify the nests of goshawks. We employed a foot survey method27 because the study area contained patchy forests in farmlands. We searched all forest areas for alternate nests within 400 m radius from an old nest in each forest patch. For all the nests that were found, we conducted periodic observations, at least once per week, with a 20–40X telescope and 8X binoculars (Nikon, Tokyo, Japan). The investigation period during a year was approximately from the beginning of March, just before the nesting period, to the middle of July, after the fledging of all the nestlings was confirmed. One or two specialists in field research on goshawks conducted the searches and the observations.

The breeding cycle of the goshawk was divided into four stages. The four stages were site occupancy (stage 1), incubating (stage 2), hatching (stage 3) and fledging (stage 4). In each nest, we recorded the success or failure of each of the four stages. In site occupancy (stage 1), an observation of ‘success’ was recorded if we observed an adult goshawk building or refurbishing a nest as evidenced by leafy twigs, or at least occupying the nest area, whereas an observation of ‘failure’ was recorded if not. In incubating (stage 2), a ‘success’ was recorded if we observed from the ground an adult sitting low (incubation posture) in the nest and a ‘failure’ if not. For hatching (stage 3), a ‘success’ was recorded if we observed at least one chick hatched and a ‘failure’ if no chicks were observed hatched. In fledging (stage 4), a ‘success’ was recorded if we observed at least one fledged young in a tree different than the nest tree and a ‘failure’ if no fledglings were observed.

On June 28, 2012, we measured the air dose rate of nuclear contaminants under the nests at 13 sites. The 13 sites were chosen at random from 40 nest sites investigated in 2012. The measurements were performed during the daytime, under cloud cover and with very little breeze. Under each nest, we measured the air dose rate three times using a dosimeter (TERRA-P, Sparing-Vist Center, Lviv, Ukraine) and recorded the average reading.

The air dose rate under the nests was considered to have a strong correlation with the total amount of the radioactive materials deposited around the nests and to be appropriate for representing the degree of nuclear contamination of the nest sites. Other alternative doses, such as radiation in nestlings, radiation in feathers, or background radiation in soil, were also important to be measured. However, the level of radiation in nestlings or feathers is speculated to show a different course from the air dose rate due to bioaccumulation. We aimed at identifying the relationship between the degree of nuclear contamination of the nest sites and the reproductive performance of the goshawk; consequently, we thought that the measurement of radiation levels in nestlings or feathers was inappropriate. Moreover, the background radiation in soil was not regarded as appropriate as the measured values were thought to reflect the contamination level of a relatively wider area. The goshawks in our study area inhabited patchy environments which varied widely, partly because of its vicinity to areas of human habitation. In addition, the environment under the nests was not necessarily forested soil. In order to evaluate the association between the direct exposure of the eggs or nestlings and the goshawks’ reproductive success, the measurement value of a smaller, more specific area was required. Therefore, we used the air dose rate under the nests.

### Comparison of pre- and postquake nest success rates

For the four stages of the reproductive cycle of goshawks, we estimated posterior distributions of the rates of site occupancy, incubating, hatching and fledging before the mega-earthquake, based on a Bayesian method. We used the summed count numbers over 19 years (1992–2010) presented in Table 1; the values occupied against total observed, incubated against occupied, hatched against incubated and fledged against hatched were used as the observed data.

We assumed that the count numbers for occupied, incubated, hatched and fledged were binomially distributed. A uniform distribution ranging from 0 to 1 was used as a prior distribution for the Bayesian analysis. We used R 3.0.2 and MCMCpack 1.3–3 for the MCMC sampling. We obtained 10,000 samples and constructed posterior distributions of the four rates.

We calculated the rates of site occupancy, incubating, hatching and fledging for each year after the earthquake (2011–2013) using the count numbers in Table 2. We mapped these data onto the corresponding posterior distributions.

The nest success was defined as a proportion of fledged nests to incubated nests, based on the definition by Squires & Kennedy11. Thus, in this study, the nest success was calculated as fledged/incubated, using the count numbers in Tables 1 and 2. We also constructed a posterior distribution of the nest success before the earthquake and mapped the nest success of each year after the earthquake on it.

### Bayesian estimation of the air dose rate effect and the site effect

For each of the rate of the four breeding stages and the nest success, we performed a hierarchical Bayesian analysis using the 13 sites where the air dose rates were measured. Our model accounted for the differences among the sites. We used recent ten years data because we did not find all the nest sites in our study area until 2004 and there seemed to be little environmental change except for the nuclear accidents during the period. The air dose rate was employed as an explanatory variable; each site was assumed to have a different effect on the rate of the breeding stage or the nest success. We used 0.05 μSv/h as the prequake air dose rate in all the sites because we did not measure the air dose rate under the nests before the earthquake and the value of 0.05 μSV/h was obtained near the measured nest within the same time period28 (the average air dose rate for the period April 1, 2010–March 14, 2011). As response variables, occupied against total observed, incubated against occupied, hatched against nested and fledged against hatched for each site were used for each stage. Fledged against incubated was also used for the analysis of the nest success. We assumed that all variables followed a binomial distribution and designated logit as a link function. Thus, our model was expressed as follows:

where *i* was the breeding site number (*i* = 1…13), *j* indicated a time period (*j* = 1: before the earthquake, *j* = 2: after the earthquake), *q**ij* was the rate of the breeding stage or nest success in breeding site *i* in time period *j*, β1 was the intercept and β2 was the coefficient of the air dose rate on the rate of the breeding stage or nest success, *X**ij* was the measured value of the air dose rate under the nest, *r**ij* was a breeding site effect on the rate of the breeding stage or nest success, dnorm(μ, τ) was a normal distribution with mean μ and precision τ, τ was a reciprocal of variance, that is, τ = 1/σ2 and dunif(*a*, *b*) was a uniform distribution ranging from *a* to *b*. The intercept β1 and the coefficient of air dose rate β2 were assumed to follow a noninformative prior distribution, a normal distribution with mean zero and precision 10−4. The breeding site effects *r**ij* were also assumed to follow a noninformative prior distribution, a normal distribution with mean zero and precision τ. τ was a hyperparameter of which the value was τ = 1/*s*2 and *s* followed a uniform distribution ranging from zero to 104, that is, the hyperparameter τ was distributed uniformly in the interval of 10−8 ≤ τ < ∞29.

We performed MCMC sampling using JAGS 3.3.0 and rjags 3–12 on R 3.0.2. In the sampling process, the first 10,000 trials were discarded as burn-in, followed by 200,000 trials with a sampling every 100 trials for one MCMC chain. The same process was applied to five chains and 10,000 samples were generated. We calculated the multivariate version of 30, a potential scale reduction factor, for the convergence diagnostic and to confirm that the value was very close to 1.0.

We constructed posterior distributions of the coefficient of the air dose rate β2, the rate of the breeding stage or the nest success *q**ij* and the breeding site effect *r**ij*, using the obtained 10,000 samples. In addition, we calculated the effect due to the difference of the air dose rate,  and the effect due to the difference of the breeding site effect,  and we compared them to determine which effect had more influence on the change of the nest success. ,  and  were posterior mean values.

## References

- Ozaki, K. et al. A mechanistic approach to evaluation of umbrella species as conservation surrogates. Conserv. Biol. 20, 1507–1515 (2006).

  Article 
  Google Scholar
- Sergio, F. et al. Top predators as conservation tools: ecological rationale, assumptions and efficacy. Annu. Rev. Ecol. Evol. Syst. 39, 1–19 (2008).

  Article 
  Google Scholar
- DeSante, D. F. & Geupel, G. R. Landbird productivity in central coastal California: the relationship to annual rainfall and a reproductive failure in 1986. Condor 89, 636–653 (1987).

  Article 
  Google Scholar
- Ellegren, H., Lindgren, G., Primmer, C. R. & Møller, A. P. Fitness loss and germline mutations in barn swallows breeding in Chernobyl. Nature 389, 593–596 (1997).

  Article 
  CAS 
  ADS 
  Google Scholar
- Møller, A. P. et al. Condition, reproduction and survival of barn swallows from Chernobyl. J. Anim. Ecol. 74, 1102–1111 (2005).

  Article 
  Google Scholar
- Møller, A. P. & Mousseau, T. A. Biological consequences of Chernobyl: 20 years on. Trends Ecol. Evol. 21, 200–207 (2006).

  Article 
  Google Scholar
- Stephan, V. Chernobyl: Poverty and stress pose ‘bigger threat’ than radiation. Nature 437, 181–181 (2005).

  Article 
  CAS 
  ADS 
  Google Scholar
- Mousseau, T. A., Nelson, N. & Shestopalov, V. Don't underestimate the death rate from Chernobyl. Nature 437, 1089–1089 (2005).

  Article 
  CAS 
  ADS 
  Google Scholar
- Møller, A. P., Karadas, F. & Mousseau, T. A. Antioxidants in eggs of great tits *Parus major* from Chernobyl and hatching success. J. Comp. Physiol. B 178, 735–743 (2008).

  Article 
  Google Scholar
- Møller, A. P., Mousseau, T. A., Lynn, C., Ostermiller, S. & Rudolfsen, G. Impaired swimming behaviour and morphology of sperm from barn swallows *Hirundo rustica* in Chernobyl. Mutat. Res. Genet. Toxicol. Environ. Mutagen. 650, 210–216 (2008).

  Article 
  Google Scholar
- Squires, J. R. & Kennedy, P. L. Northern Goshawk ecology: an assessment of current knowledge and information needs for conservation and management. Stud. Avian Biol. 31, 8–62 (2006).

  Google Scholar
- Horie, R., Endo, K., Nonaka, J. & Ozaki, K. Seasonal change in home range of male Northern Goshawk in central Japan. Jpn. J. Ornithol. 56, 22–32 (2007).

  Article 
  Google Scholar
- Nuclear Regulation Authority. 2012. Available: Analysis Results Concerning (i) Gamma-emitting Nuclidesand (ii) Sr-89 and Sr-90 (Second Distribution Survey) by MEXT http://radioactivity.nsr.go.jp/en/contents/6000/5636/24/338\_Sr\_0912018\_e.pdf Accessed 11 August, 2014.
- Yablokov, A. V., Nesterenko, V. B. & Nesterenko, A. V. Chernobyl: Consequences of the catastrophe for people and the environment. (Blackwell, Boston, 2010).
- Kenward, R. The Goshawk. (T&A D Poyser, London, 2006).
- Ozaki, K. & Endo, K. (eds) Ecology and conservation of Northern Goshawk: toward its population conservation. (Japan forest technology association, Tokyo, 2008) (in Japanese).
- Murakami, M. et al. Biological proliferation of cesium-137 through the detrital food chain in a forest ecosystem in Japan. Sci. Rep. 4, 3599 (2014).

  Article 
  Google Scholar
- Kryshev, I. I., & Ryabov, I. N. About the efficiency of trophic levels in the accumulation of Cs-137 in fish of the Chernobyl NPP cooling pond. Biological and radioecological aspects of the consequences of the Chernobyl Accident. 116–121 (USSR Academy of Sciences, Moscow, 1990).
- Kryshev, I., Alexakhin, R. & Makhonko, K. Radioecological consequences of the Chernobyl accident. (Nuclear Society, Moscow, 1992).
- Smith, M. H., Oleksyk, T. K., & Tsyusko, O. Effects of trophic position and ecosystem type on the form of the frequency distribution of radiocesium at Chornobyl and nuclear sites in the United States. In:: Proceedings of the international symposium: transfer of radionuclides in biosphere: prediction and assessment, December 18–19, 2002. 37–48 (Mito, Japan, 2002).
- Froidevaux, P., Bochud, F. & Haldimann, M. Retention half times in the skeleton of plutonium and 90Sr from above-ground nuclear tests: A retrospective study of the Swiss population. Chemosphere 80, 519–524 (2010).

  Article 
  CAS 
  ADS 
  Google Scholar
- Møller, A. P., Bonisoli-Alquati, A., Rudolfsen, G., & Mousseau, T. A. Elevated mortality among birds in Chernobyl as judged from skewed age and sex ratios. PLoS ONE 7, e35223 (2012).

  Article 
  ADS 
  Google Scholar
- Møller, A. P. & De Lope, F. Senescence in a short-lived migratory bird: age-dependent morphology, migration, reproduction and parasitism. J. Anim. Ecol. 68, 163–171 (1999).

  Article 
  Google Scholar
- Møller, A. P. et al. Abundance of birds in Fukushima as judged from Chernobyl. Environ. Pollut. 164, 36–39 (2012).

  Article 
  Google Scholar
- Møller, A. P., Nishiumi, I., Suzuki, H., Ueda, K., & Mousseau, T. A. Differences in effects of radiation on abundance of animals in Fukushima and Chernobyl. Ecol. Indic. 24, 75–81 (2013).

  Article 
  Google Scholar
- Møller, A. P. & Nielsen, J. T. Parental defense of offspring and life history of a long-lived raptor. Behav. Ecol. 25, 1505–1512 (2014).

  Article 
  Google Scholar
- Kennedy, P. L. & Andersen, D. E. Research and Monitoring Plan for Northern Goshawks (Accipter Gentilis Atricapillus) in the Western Great Lakes Region. (Minnesota Cooperative Fish and Wildlife Research Unit, University of Minnesota, 2005).
- Nuclear Regulation Authority. Environmental Radioactivity and Radiation Survey Report (fiscal 2010–2011) http://www.kankyo-hoshano.go.jp/en/01/0101flash/01012009.html Accessed 15 August, 2014.
- Gelman, A. Prior distributions for variance parameters in hierarchical models. Bayesian Anal. 1, 515–533 (2006).

  Article 
  MathSciNet 
  Google Scholar
- Brooks, S. P. & Gelman, A. General methods for monitoring convergence of iterative simulations. J. Comput. Graph. Stat. 7, 434–455 (1998).

  MathSciNet 
  Google Scholar

Download references

## Acknowledgements

We thank Jun Nonaka, Hiroki Funatsumaru, Hiromi Kawada and Daisuke Nagano for the assistance in the field investigation; Koji Machidori for medical support. We also thank the local residents in the study area. This research was funded by the Goshawk Protection Fund (a non-profit organization) in Japan supported by the members' donations.

## Author information

### Authors and Affiliations

1. Graduate School of Natural Science and Research Center for biological diversity, Nagoya City University, 1 Yamanohata, Mizuho-cho, Mizuho-ku, Nagoya, Aichi, 467-8501, Japan

   Kaori Murase
2. Goshawk Protection Fund, 2-5-1 Hanawada, Utsunomiya, Tochigi, 320-0027, Japan

   Joe Murase, Reiko Horie & Koichi Endo

Authors

1. Kaori Murase

   View author publications

   You can also search for this author in
   PubMed Google Scholar
2. Joe Murase

   View author publications

   You can also search for this author in
   PubMed Google Scholar
3. Reiko Horie

   View author publications

   You can also search for this author in
   PubMed Google Scholar
4. Koichi Endo

   View author publications

   You can also search for this author in
   PubMed Google Scholar

### Contributions

K.E. conceived and designed the study, managed the project. K.E., R.H. and K.M. performed the fieldwork. R.H. managed the data. K.M. and J.M. analysed the data and developed the figures. K.M. drafted the initial manuscript. All the coauthors commented on and provided substantial edits to the manuscript.

## Ethics declarations

### Competing interests

The authors declare no competing financial interests.

## Electronic supplementary material

### Supplementary Information

Supplementary Information

## Rights and permissions

This work is licensed under a Creative Commons Attribution 4.0 International License. The images or other third party material in this article are included in the article's Creative Commons license, unless indicated otherwise in the credit line; if the material is not included under the Creative Commons license, users will need to obtain permission from the license holder in order to reproduce the material. To view a copy of this license, visit http://creativecommons.org/licenses/by/4.0/

Reprints and permissions

## About this article

### Cite this article

Murase, K., Murase, J., Horie, R. *et al.* Effects of the Fukushima Daiichi nuclear accident on goshawk reproduction.
*Sci Rep* **5**, 9405 (2015). https://doi.org/10.1038/srep09405

Download citation

- Received: 21 November 2014
- Accepted: 03 March 2015
- Published: 24 March 2015
- DOI: https://doi.org/10.1038/srep09405

### Share this article

Anyone you share the following link with will be able to read this content:

Get shareable link

Sorry, a shareable link is not currently available for this article.

Copy to clipboard

Provided by the Springer Nature SharedIt content-sharing initiative

## This article is cited by

- ### Decline in the Conception Rate of Wild Japanese Monkeys after the Fukushima Daiichi Nuclear Power Plant Accident

  - Shin-ichi Hayama
  - Setsuko Nakanishi
  - Toshinori Omi

  *Archives of Environmental Contamination and Toxicology* (2024)
- ### Oxidation behavior of Cr-coated zirconium alloy cladding in high-temperature steam above 1200 °C

  - Hai-Bin Ma
  - Jun Yan
  - Mei-Yi Yao

  *npj Materials Degradation* (2021)
- ### Assessing the impact of large-scale farmland abandonment on the habitat distributions of frog species after the Fukushima nuclear accident

  - Noe Matsushima
  - Sadao Ihara
  - Toshihiro Horiguchi

  *Oecologia* (2021)
- ### Developmental and hemocytological effects of ingesting Fukushima’s radiocesium on the cabbage white butterfly Pieris rapae

  - Wataru Taira
  - Mariko Toki
  - Joji M. Otaki

  *Scientific Reports* (2019)
- ### Effects of environmental radiation on testes and spermatogenesis in wild large Japanese field mice (Apodemus speciosus) from Fukushima

  - Tsukasa Okano
  - Hiroko Ishiniwa
  - Masanori Tamaoki

  *Scientific Reports* (2016)

## Comments

By submitting a comment you agree to abide by our Terms and Community Guidelines. If you find something abusive or that does not comply with our terms or guidelines please flag it as inappropriate.


Download PDF

Advertisement

## Explore content

- Research articles
- News & Comment
- Collections
- Subjects

- Follow us on Facebook
- Follow us on Twitter
- Sign up for alerts
- RSS feed


## About the journal

- Open Access Fees and Funding
- About Scientific Reports
- Contact
- Journal policies
- Calls for Papers
- Guide to referees
- Editor's Choice
- Journal highlights


## Publish with us

- For authors
- Language editing services
- Submit manuscript

## Search

Search articles by subject, keyword or author

Show results from

All journals
This journal

Search

Advanced search

### Quick links

- Explore articles by subject
- Find a job
- Guide to authors
- Editorial policies

Scientific Reports (*Sci Rep*)

ISSN 2045-2322 (online)

## nature.com sitemap

### About Nature Portfolio

- About us
- Press releases
- Press office
- Contact us

### Discover content

- Journals A-Z
- Articles by subject
- protocols.io
- Nature Index

### Publishing policies

- Nature portfolio policies
- Open access

### Author & Researcher services

- Reprints & permissions
- Research data
- Language editing
- Scientific editing
- Nature Masterclasses
- Research Solutions

### Libraries & institutions

- Librarian service & tools
- Librarian portal
- Open research
- Recommend to library

### Advertising & partnerships

- Advertising
- Partnerships & Services
- Media kits
- Branded
  content

### Professional development

- Nature Careers
- Nature 
  Conferences

### Regional websites

- Nature Africa
- Nature China
- Nature India
- Nature Italy
- Nature Japan
- Nature Middle East

- Privacy
  Policy
- Use
  of cookies
- Your privacy choices/Manage cookies
- Legal
  notice
- Accessibility
  statement
- Terms & Conditions
- Your US state privacy rights

© 2024 Springer Nature Limited

xml version="1.0" encoding="UTF-8"?

Close banner

Close

Sign up for the *Nature Briefing* newsletter — what matters in science, free to your inbox daily.

Email address

Sign up

I agree my information will be processed in accordance with the *Nature* and Springer Nature Limited Privacy Policy.

Close banner

Close

Get the most important science stories of the day, free in your inbox.
Sign up for Nature Briefing
